# Supplementary material for: Bacterial Nanocellulose from Komagataeibacter Medellinensis in Fique Juice for Activated Carbons Production and Its Application for Supercapacitor Electrodes
Source: MDPI journal article supplement (doi:10.3390/polym15071760), 2023-04-01
Supplement: s1 [file s1]

## Supplementary Information for

### Bacterial nanocellulose from *Komagataeibacter Medellinensis* in fique juice for activated carbons production and its application for supercapacitor electrodes

Juliana Villarreal-Rueda <sup>1</sup>, Zulamita Zapata-Benabithé <sup>2,\*</sup>, Laia Posada <sup>3</sup>, Estefanía Martínez <sup>3</sup>, Sara Herrera <sup>3</sup>, Stiven López <sup>3</sup>, Ana BJ Sobrido <sup>4</sup>, Cristina I. Castro<sup>3</sup>

<sup>1</sup> Semillero de Termofluidos y Conversión de la Energía, Ingeniería Química, Escuela de Ingenierías, Universidad Pontificia Bolivariana, Medellín (Colombia)

<sup>2</sup> Grupo de Energía y Termodinámica, Ingeniería Química, Escuela de Ingenierías, Universidad Pontificia Bolivariana, Medellín (Colombia)

<sup>3</sup> Grupo de Investigación sobre Nuevos Materiales, Ingeniería en Nanotecnología, Escuela de Ingenierías, Universidad Pontificia Bolivariana, Medellín (Colombia)

<sup>4</sup> School of Engineering and Materials Science, Queen Mary University of London, London, United Kingdom

\*zulamita.zapata@upb.edu.co

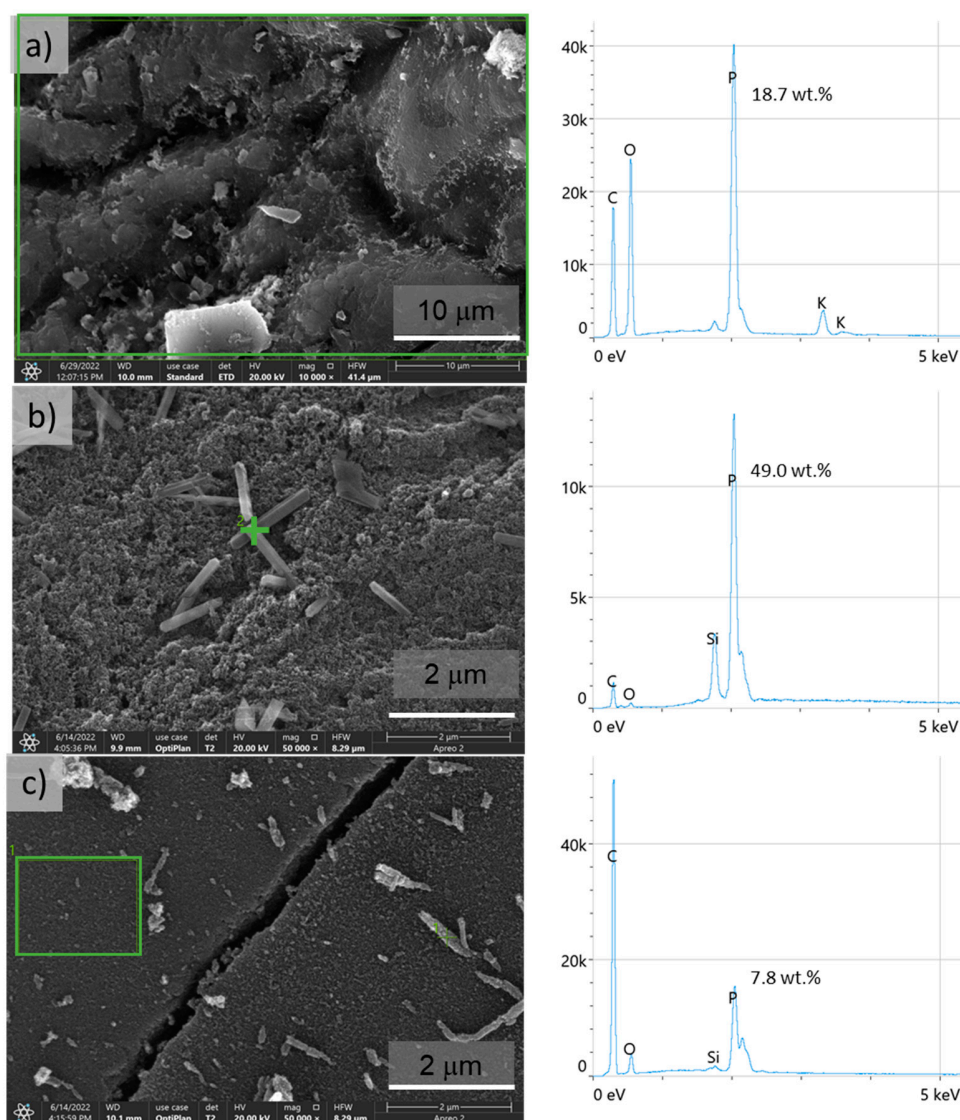

**Figure S1.** SEM images and EDX spectra of BNCA-P at 500 °C X10000 (a) and 600 °C X50000 (b and c).

**Table S1.** Binding energies of functional groups of XPS high-resolution spectra C<sub>1s</sub>, O<sub>1s</sub>, and P<sub>2p</sub>.

| C <sub>1s</sub> [1, 2] |                                | O <sub>1s</sub> [1, 3] |                                          | P <sub>2p</sub> [3] |                                                                                              |
|------------------------|--------------------------------|------------------------|------------------------------------------|---------------------|----------------------------------------------------------------------------------------------|
| B.E. (eV)              | Functional group               | B.E. (eV)              | Functional group                         | B.E. (eV)           | Functional group                                                                             |
| 284.6                  | C=C                            | 530.5                  | Quinone C=O                              | 132.2               | C <sub>3</sub> -PO                                                                           |
| 285.3                  | C-C sp <sup>3</sup> aliphatic  | 531.3                  | O=C + O=P                                | 133.5               | C-PO <sub>3</sub> o C <sub>2</sub> -PO <sub>2</sub>                                          |
| 287.5                  | R-OH and C-O-C<br>and/or C-O-P | 532.4                  | O-C + COH + C-O-C +<br>P-O               | 134.5               | C-O-P, (CO) <sub>3</sub> PO,<br>(CO) <sub>2</sub> PO <sub>2</sub> and<br>(CO)PO <sub>3</sub> |
| 286.3                  | C=O + >C=O                     | 533.3                  | C-OH and/or P-O- P                       |                     |                                                                                              |
| 289.3                  | -C(O)-O-C                      | 534.5                  | Oxygen chemisorb and<br>H <sub>2</sub> O |                     |                                                                                              |
| 291.6                  | $\pi$ - $\pi$ *                |                        |                                          |                     |                                                                                              |

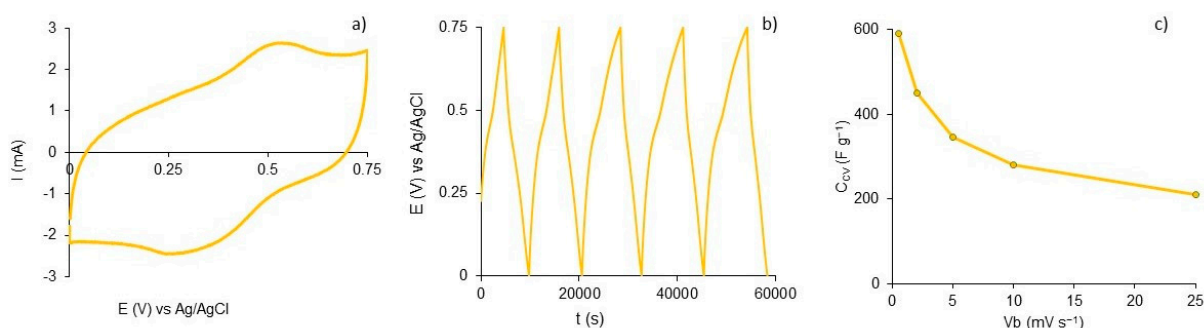Figure S2. (a) Cyclic voltammetry curves at 0.5 mV s<sup>-1</sup>, (b) Charge/Discharges curves at 0.125 A g<sup>-1</sup>, and (c) Capacitance as a function of scan rate for K700 sample.

## References

1. Puziy AM, Poddubnaya OI, Ziatdinov AM (2006) On the chemical structure of phosphorus compounds in phosphoric acid-activated carbon. *Appl Surf Sci* 252:8036–8038
2. Li W, Wang J (2016) Significant enhancement of the cycling performance and rate capability of the P/C composite via chemical bonding ( P-C ). *J Mater Chem A* 4:505–511
3. Liu Y, Li K, Liu Y, et al (2015) The high-performance and mechanism of P-doped activated carbon as a catalyst for air-cathode microbial fuel cells. *J Mater Chem A* 3:21149–21158
